# Supplementary material for: A two-dimensional volatility basis set – Part 3: Prognostic modeling and NO x dependence
Source: Copernicus journal article supplement (doi:10.5194/acp-16-123-2016), 2016-01-15
Supplement: Supplementary file 1 [file 2D aP yields.xls]

## Sheet: Sheet1
1D yields			C*	-2	-1	0	1	2	3	4	5	6
			alpha	0.004	0	0.051	0.086	0.12	0.183	0.4	0.35	0.2	1.394
	-5	-4	-3	-2	-1	0	1	2	3	4	5	6	7	8	9
1																1
0.9		0.001														0.9
0.8																0.8
0.7																0.7
0.6																0.6
0.5					0.003	0.009	0.007	0.003								0.5
0.4						0.019	0.027	0.025	0.014	0.01						0.4
0.3						0.008	0.021	0.046	0.064	0.074	0.05					0.3
0.2							0.01	0.02	0.065	0.135	0.17	0.029				0.2
0.1								0.001	0.007	0.02	0.03	0.132				0.1
0																0
sum		0.001	0	0	0.003	0.036	0.065	0.095	0.15	0.239	0.25	0.161	0	0	0	1
					OC:OM	0.705882	0.755814	0.791667	0.819672	0.5975	0.714286	0.805
% of OC in each bin
1
0.9
0.8
0.7
0.6
0.5						0.25	0.107692	0.0315789
0.4						0.527778	0.415385	0.263158	0.0933333	0.041841
0.3						0.222222	0.323077	0.484211	0.426667	0.309623	0.2
0.2							0.153846	0.210526	0.433333	0.564854	0.68	0.180124
0.1								0.0105263	0.0466667	0.083682	0.12	0.819876
0
					OM:OC	1.41667	1.32308	1.26316	1.22	1.67364	1.4	1.24224
NEW YIELDS			OM	0	0.00013	0.032	0.04	0.48	0.21	0.16	0.31	0.16	1.39213
			OC		0.00013	0.0225882	0.0302326	0.38	0.172131	0.0956	0.221429	0.1288
1
0.9
0.8
0.7
0.6
0.5					0.00013	0.00564706	0.00325581	0.012
0.4						0.0119216	0.0125581	0.1	0.0160656	0.004
0.3						0.00501961	0.00976744	0.184	0.0734426	0.0296	0.0442857
0.2							0.00465116	0.08	0.0745902	0.054	0.150571	0.0232
0.1								0.004	0.00803279	0.008	0.0265714	0.1056
0
