# Supplementary material for: A two-dimensional volatility basis set – Part 3: Prognostic modeling and NO x dependence
Source: Copernicus journal article supplement (doi:10.5194/acp-16-123-2016), 2016-01-15
Supplement: Supplementary file 2 [file PSI_Other.dat.xlsx]

## Sheet: Sheet1
t(OH)	COA	O:C	GF95	VFR
-3.91514	27.4674	0.399865	1.23187	0.610398
-3.71347	33.9609	0.393217	1.23415	0.608715
-3.60639	35.2945	0.38661	1.2341	0.63451
-3.41861	40.8634	0.381003	1.24018	0.616638
-3.31167	43.4004	0.385406	1.24969	0.635836
-3.12403	50.6636	0.390637	1.24973	0.622591
-3.01694	52.6115	0.386197	1.24824	0.624366
-2.82931	56.7981	0.382528	1.25801	0.622548
-2.735	57.3275	0.382037	1.2623	0.617171
-2.64181	57.8879	0.382723	1.26855	0.640626
-2.54722	59.7698	0.377005	1.28663	0.632434
-2.44028	60.6549	0.372253	1.27171	0.635347
-2.33208	59.2994	0.389574	1.25929	0.6396
-1.93028	60.4801	0.377913	1.28186	0.638345
-1.82319	59.9957	0.376288	1.25156	0.644269
-1.71472	58.4764	0.376487	1.26719	0.64483
-1.62167	58.8292	0.366897	1.27542	0.655391
-1.51458	58.4026	0.37199	1.29602	0.651609
-1.40625	56.6761	0.384004	1.30542	0.649648
-1.31306	56.7825	0.381775	1.29874	0.660269
-1.20569	55.8806	0.379371	1.31625	0.661449
-1.0975	54.0563	0.382212	1.33032	0.660041
-0.897361	53.0653	0.383274	1.32584	0.663863
-0.789028	50.7367	0.385514	1.33515	0.671249
-0.695972	49.4525	0.380819	1.34302	0.679461
-0.373611	45.953	0.370607	1.34101	0.690936
-0.266528	45.2667	0.373845	1.29746	0.675957
-0.159583	43.6196	0.382355	1.29053	0.684186
-0.05125	42.3577	0.38114	1.31381	0.685346
0.0558333	42.4671	0.387673	1.31286	0.683308
0.164306	43.5122	0.389515	1.32814	0.671396
0.27125	45.2722	0.393031	1.33061	0.658324
0.379722	45.5253	0.404277	1.33324	0.66885
0.486806	45.2939	0.409039	1.34743	0.64997
0.58	45.8065	0.403457	1.33417	0.648926
0.687083	46.762	0.404488	1.3267	0.649234
0.794028	47.1993	0.402941	1.36509	0.633972
0.887222	46.5014	0.4035	1.37735	0.636335
0.995556	46.3673	0.415495	1.36617	0.639801
1.19569	46.5723	0.417513	1.37706	0.622535
1.30403	45.7509	0.422546	1.37092	0.638262
1.41111	45.6061	0.420803	1.3702	0.636807
1.50431	45.9683	0.424554	1.36602	0.625675
1.61292	45.3275	0.430948	1.3689	0.64156
1.71986	44.3526	0.428868	1.39243	0.632048
1.81292	44.2434	0.425998	1.39202	0.630206
1.92	44.4102	0.431095	1.37553	0.621783
2.02722	43.6942	0.429669	1.38733	0.624418
2.12	42.5711	0.430508	1.38051	0.633729
2.22847	42.7418	0.430902	1.3684	0.647277
2.33542	42.685	0.433723	1.36327	0.626319
2.42861	41.735	0.425281	1.37962	0.630009
2.53778	40.9116	0.434871	1.38718	0.635856
2.65125	41.1801	0.430962	1.4016	0.629267
2.74556	40.5388	0.433004	1.38077	0.622245
2.85375	39.471	0.434935	1.35691	0.650831
2.96083	38.7954	0.428958	1.37016	0.644497
3.05375	38.7932	0.437	1.37234	0.637594
3.16208	38.1557	0.434444	1.37843	0.644198
3.26917	37.2016	0.440163	1.39942	0.64026
3.47056	36.8642	0.435453	1.3885	0.632703
3.57778	36.2521	0.439257	1.3952	0.638145
3.67069	35.2401	0.437794	1.40105	0.647709
3.77903	34.6246	0.435059	1.39241	0.666627
3.88611	34.993	0.435483	1.39369	0.632842
3.97931	34.2101	0.441324	1.39162	0.645829
4.08625	33.1679	0.443857	1.37791	0.660122
4.19333	32.6064	0.441145	1.40463	0.657333
4.28653	32.7296	0.438915	1.41594	0.638727
