# Supplementary material for: A two-dimensional volatility basis set – Part 3: Prognostic modeling and NO x dependence
Source: Copernicus journal article supplement (doi:10.5194/acp-16-123-2016), 2016-01-15
Supplement: Supplementary file [file acp-16-123-2016-supplement-title-page.pdf › acp-16-123-2016-supplement-title-page.pdf]

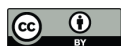

## *Supplement of*

# **A two-dimensional volatility basis set – Part 3: Prognostic modeling and NO<sub>x</sub> dependence**

**W. K. Chuang and N. M. Donahue**

*Correspondence to:* N. M. Donahue (nmd@andrew.cmu.edu)

- acp-16-123-2016-supplement-title-page.pdf
- Kinetic
  - analysis
    - \* AIDABoxes.m
    - \* AIDAExperiment.m
    - \* CMUBoxes.m
    - \* CMUExperiment.m
    - \* OM\_OC\_plot.m
    - \* PSIBoxes.m
    - \* PSIExperiment.m
    - \* SAPHIRBoxes.m
    - \* SAPHIRExperiment.m
    - \* aPineneAgingTimeseries.m
    - \* aPineneCYields2DHOOH.m
    - \* bar3graphs.m
    - \* barVolatilityGraphs.m
    - \* chamberPlot\_N.m
    - \* commonChamberConstants.m
    - \* exptPlots\_N.m
    - \* graphNames.m
    - \* idealBoxes.m
    - \* idealExperiment.m
    - \* idealExperiment\_plotting.m
    - \* parameters.m
    - \* saveTightFigure.m
    - \* setupAPinene2D.m
    - \* startupAnalysis.m

- \* testPlot.m
- analysis.std
  - \* CNum2DModified.m
  - \* OC2OM.m
  - \* OM2OC.m
  - \* OM\_2D.m
  - \* agingCellBase.m
  - \* computeOrganicEquilibrium.m
  - \* computeYieldArray.m
  - \* diluteChamber.m
  - \* distinguishable\_colors.m
  - \* initCStructure.m
  - \* initResultStructure.m
  - \* oxOH2D\_0N.m
  - \* oxOH2D\_1N.m
  - \* particleWallLoss.m
  - \* partitionAerosol.m
  - \* precursorAging.m
  - \* splitOH2D\_0N.m
  - \* splitOxOH2D\_1N.m
  - \* splitSplitOH2D\_1N.m
  - \* suspendedAging.m
  - \* suspendedPhotolysis.m
  - \* vaporAging.m
  - \* vaporAging\_old.m
  - \* vaporPhotolysis.m
  - \* vaporWallLoss.m
- data
  - \* 2D aP yields.xls
  - \* CMU.dat
  - \* CMU\_HONO.dat
  - \* CMU\_OtoC.dat
  - \* PSI.dat
  - \* PSI\_High.txt
  - \* PSI\_Other.dat
  - \* PSI\_Other.dat.xlsx
  - \* PSI\_OtoC.dat
  - \* SOA08\_14.dat
  - \* SOA08\_14\_OtoC.dat
  - \* SOA10.dat
  - \* SOA10v2.dat
- figs
  - \* 3Dbar\_susp\_0N\_600min\_100\_beta15\_untyped.pdf
  - \* 3Dbar\_susp\_totalN\_0min\_100\_beta15\_untyped.pdf
  - \* 3Dbar\_tot\_totalN\_0min\_100\_beta15\_untyped.pdf
  - \* MUCHACHAS
  - \* MUCHACHAS\_Paper

- \* NtoC\_ratio.pdf
  - \* OM\_compare\_wrt\_t\_beta15\_untyped.pdf
  - \* OM\_varyConc\_varyBeta\_0hours.pdf
  - \* OM\_varyConc\_varyBeta\_10hours.pdf
- README.txt
- figs
  - MUCHACHAS
    - \* MUCHACHAS\_Paper
- scripts
  - fitting
    - \* .DS\_Store
    - \* functions
    - \* lstsqrs
  - semiVolatile
    - \* .DS\_Store
    - \* 2D
    - \* functions
    - \* partitioning
  - whereTheyAre
    - \* whereThingsAreCMU.m
    - \* whereThingsAreCMU.m
    - \* whereThingsAreFTIR.m
    - \* whereThingsAreFTIR.m
    - \* whereThingsAreFTIRAnalysis.m
    - \* whereThingsAreFitting.m
    - \* whereThingsAreMaster.m
    - \* whereThingsAreRateConstants.m
    - \* whereThingsAreSemiVolatile.m
- startup.m

The copyright of individual parts of the supplement might differ from the CC-BY 3.0 licence.
