# Supplementary figures and images for: A two-dimensional volatility basis set – Part 3: Prognostic modeling and NO x dependence
Source: Copernicus journal article supplement (doi:10.5194/acp-16-123-2016), 2016-01-15

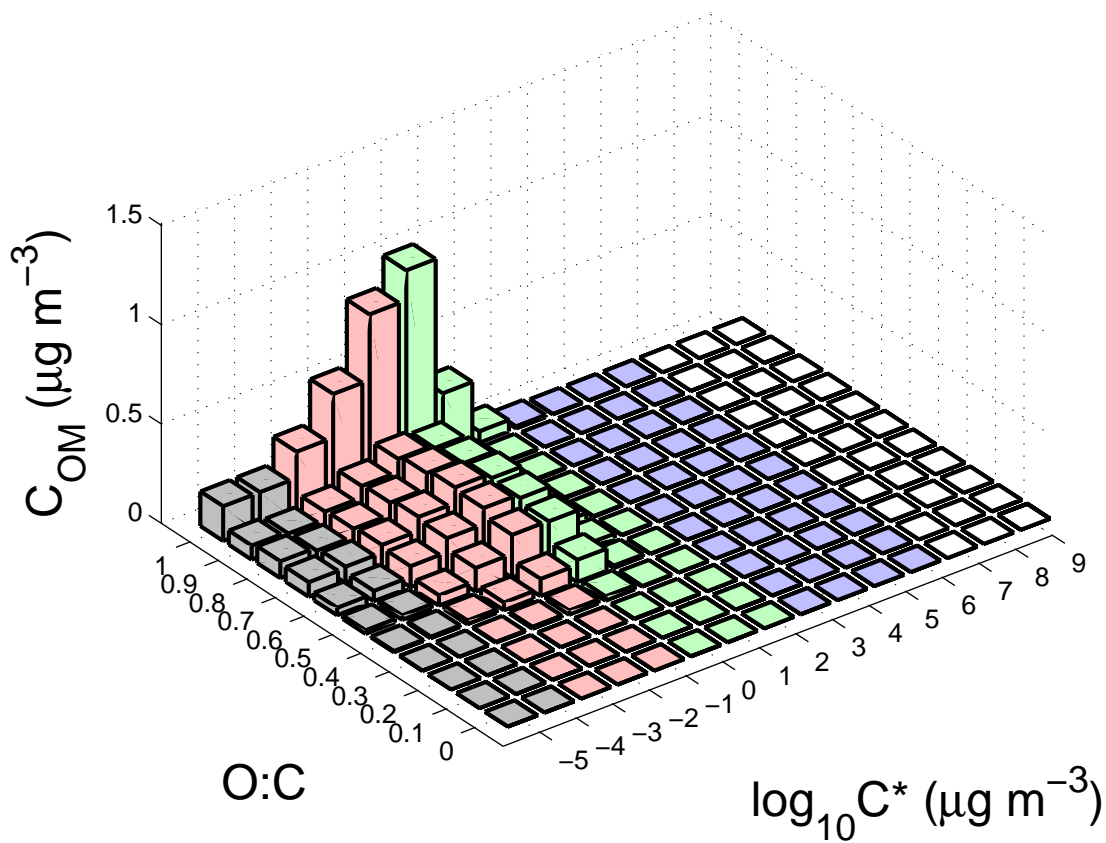

Supplement: Supplementary file 1 [file 3Dbar_susp_0N_600min_100_beta15_untitled.pdf › Kinetic/figs/3Dbar_susp_0N_600min_100_beta15_untitled.pdf]

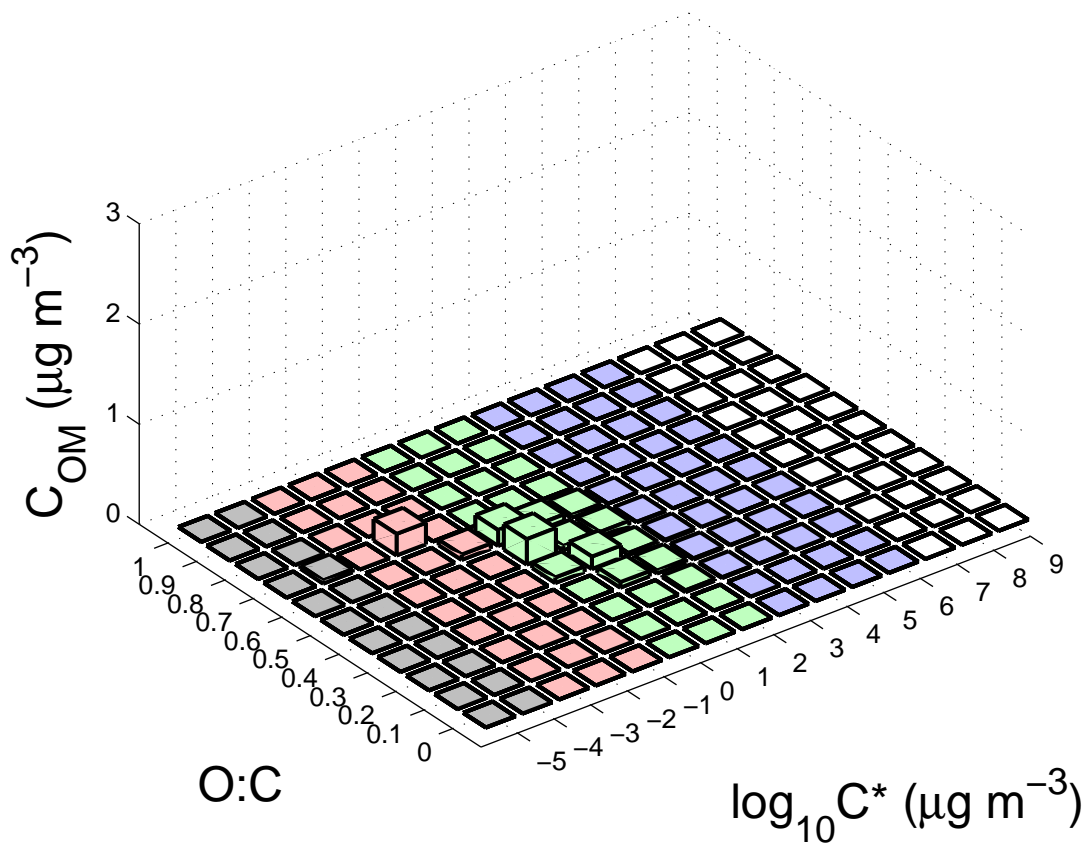

Supplement: Supplementary file 2 [file 3Dbar_susp_totalN_0min_100_beta15_untitled.pdf › Kinetic/figs/3Dbar_susp_totalN_0min_100_beta15_untitled.pdf]

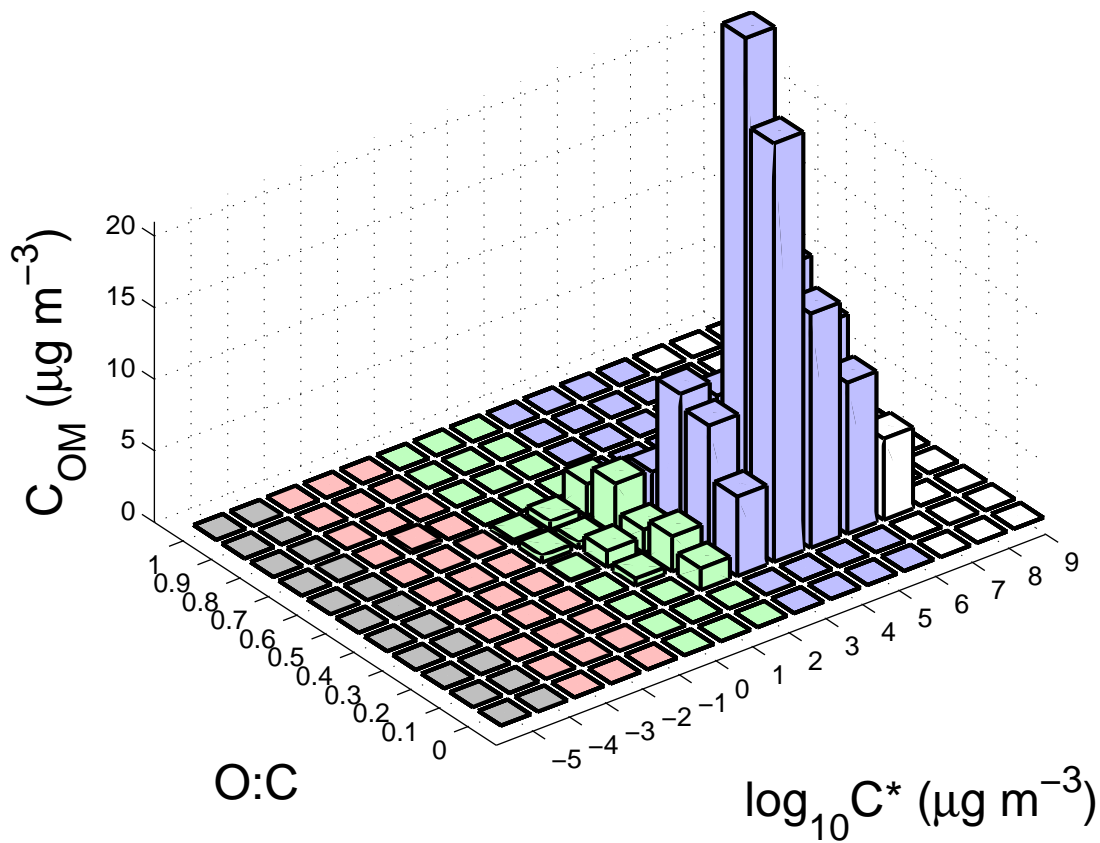

Supplement: Supplementary file 3 [file 3Dbar_tot_totalN_0min_100_beta15_untitled.pdf › Kinetic/figs/3Dbar_tot_totalN_0min_100_beta15_untitled.pdf]

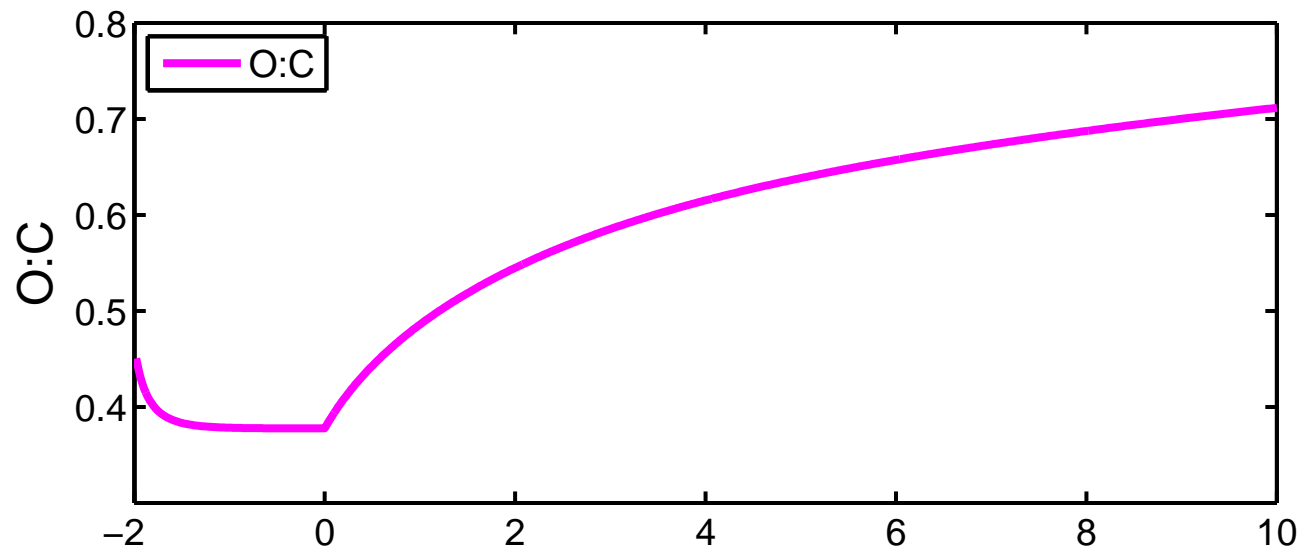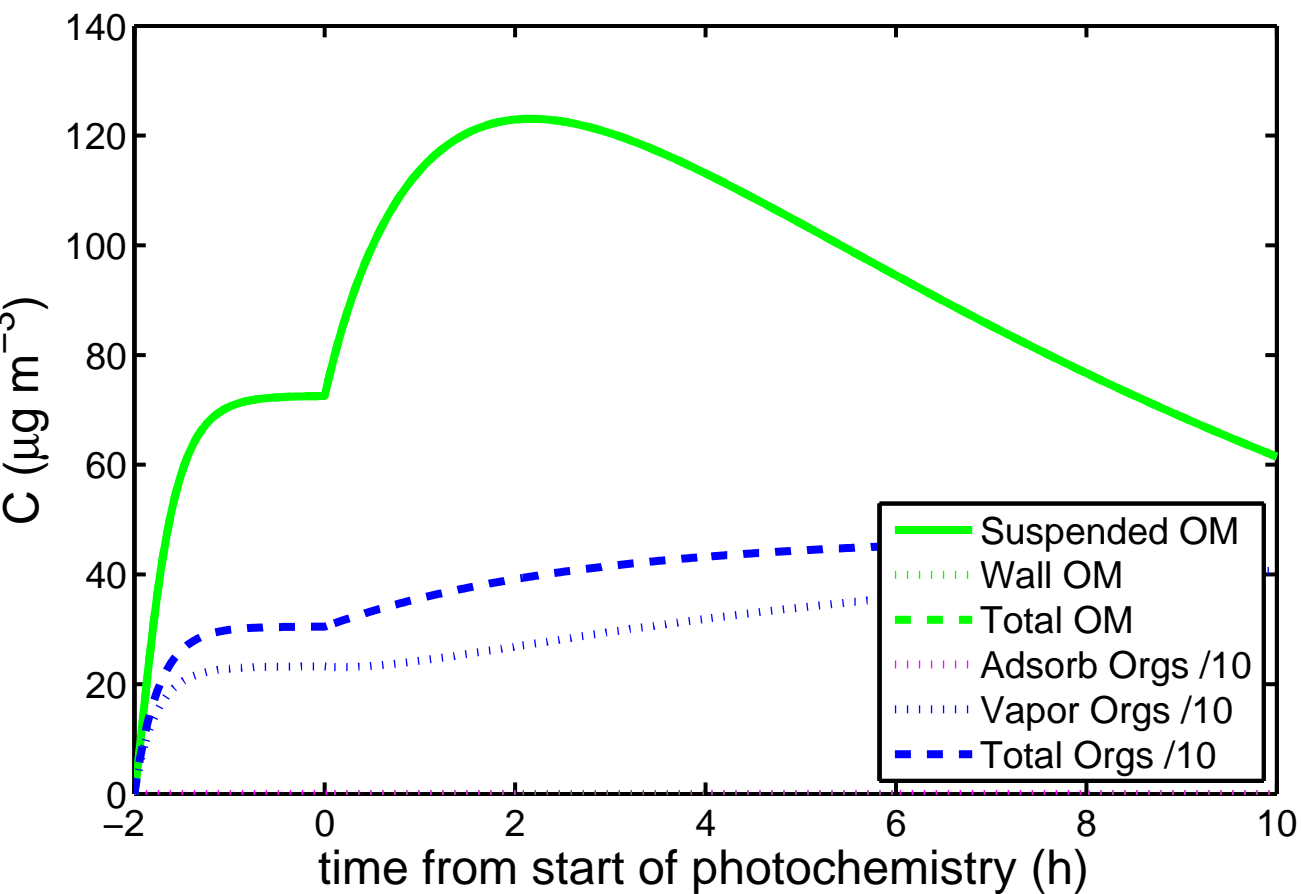

Supplement: Supplementary file 4 [file ideal.pdf › Kinetic/figs/MUCHACHAS/ideal.pdf]

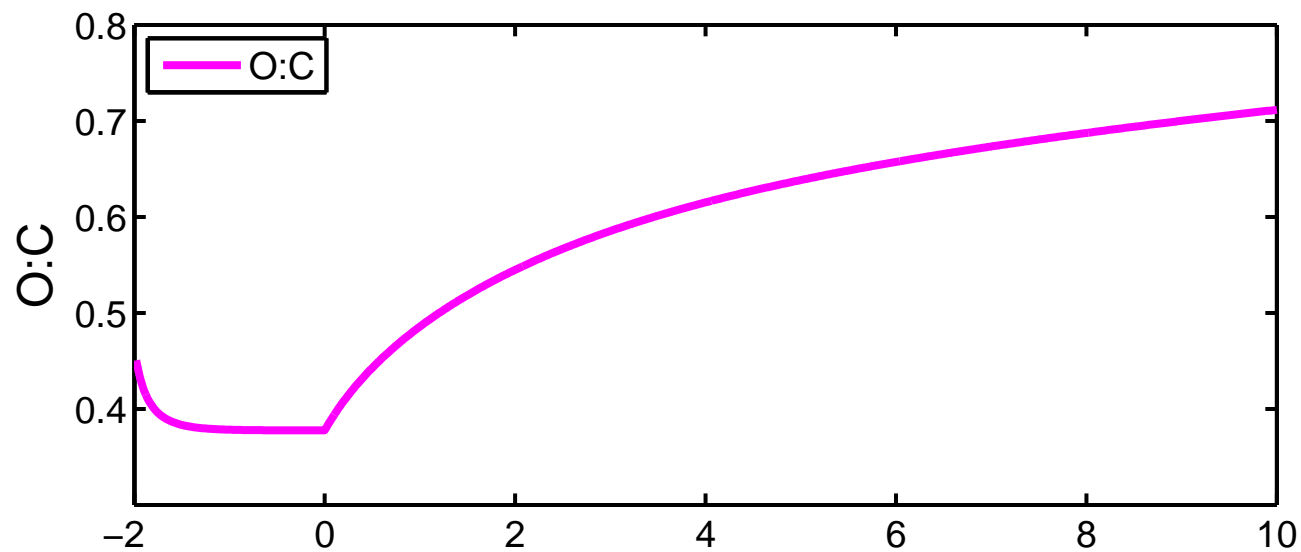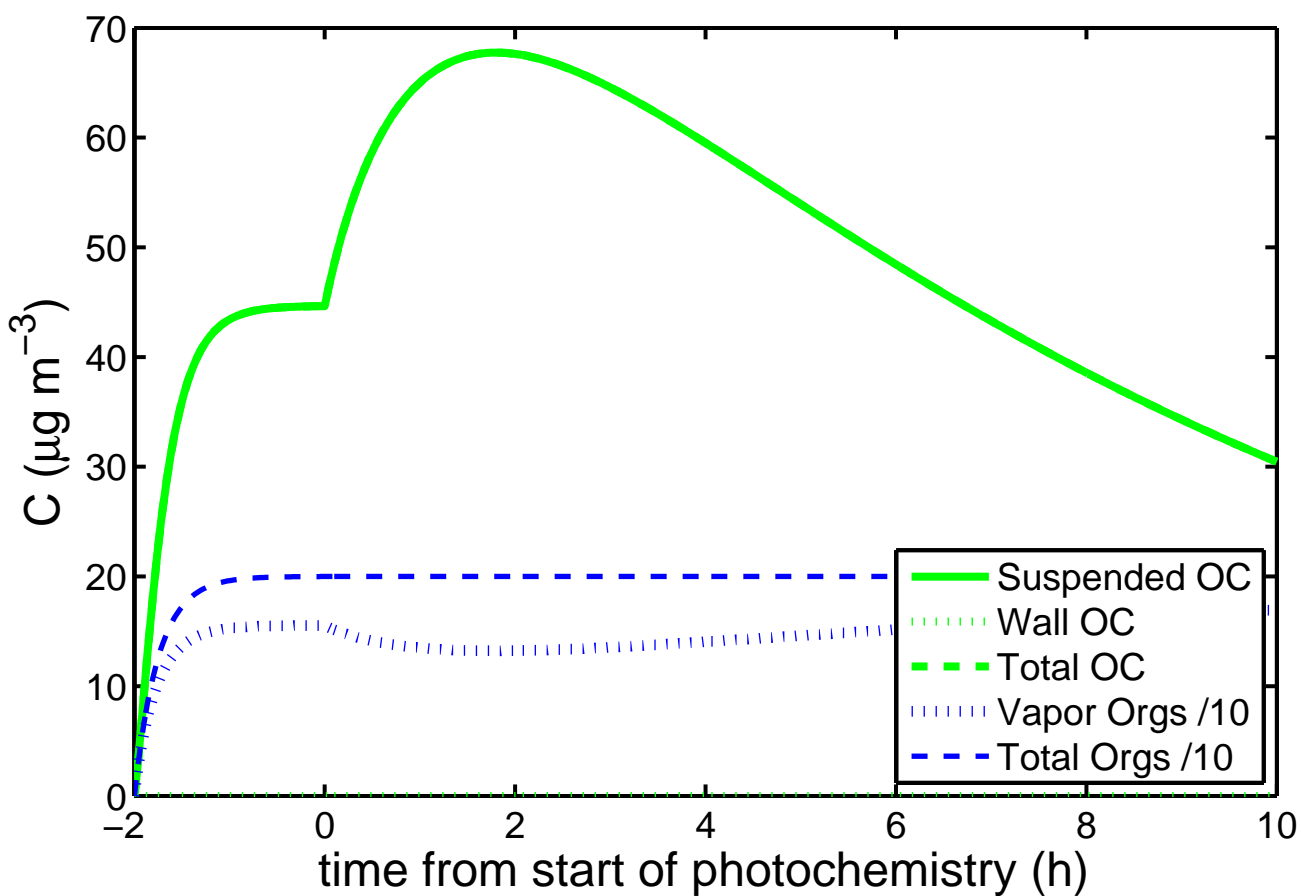

Supplement: Supplementary file 5 [file ideal_C.pdf › Kinetic/figs/MUCHACHAS/ideal_C.pdf]

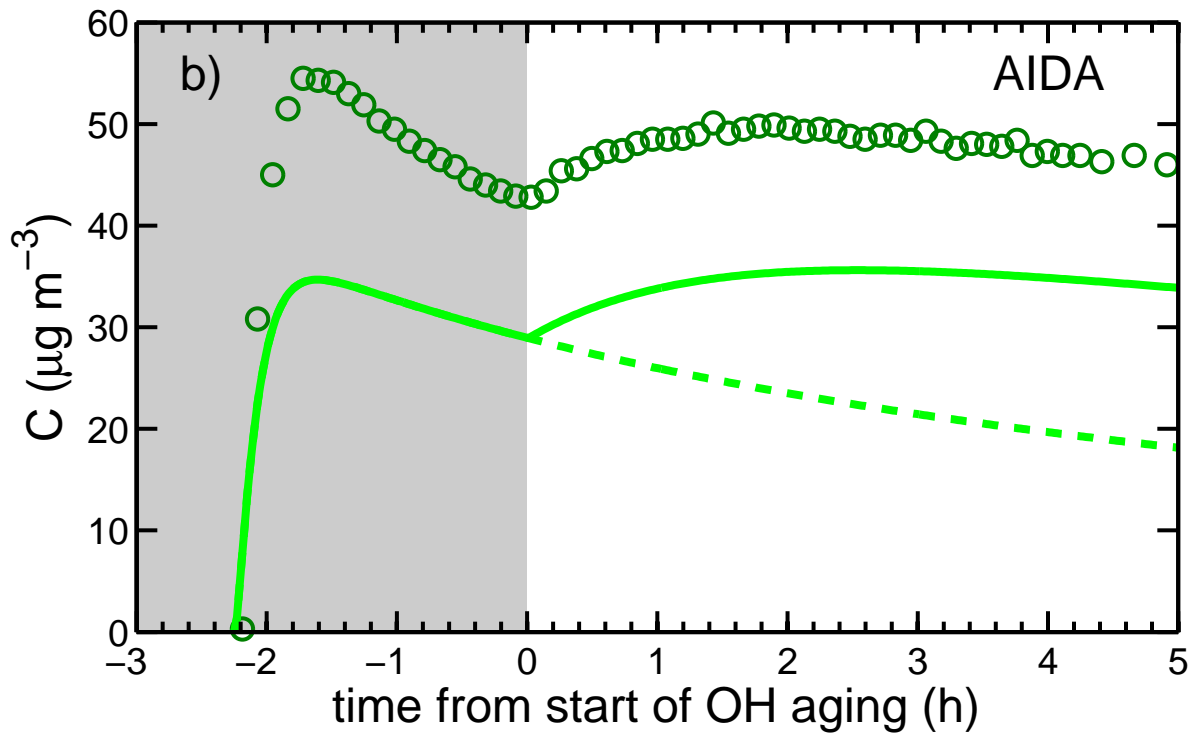

Supplement: Supplementary file 6 [file AIDA_Chamber.pdf › Kinetic/figs/MUCHACHAS_Paper/AIDA_Chamber.pdf]

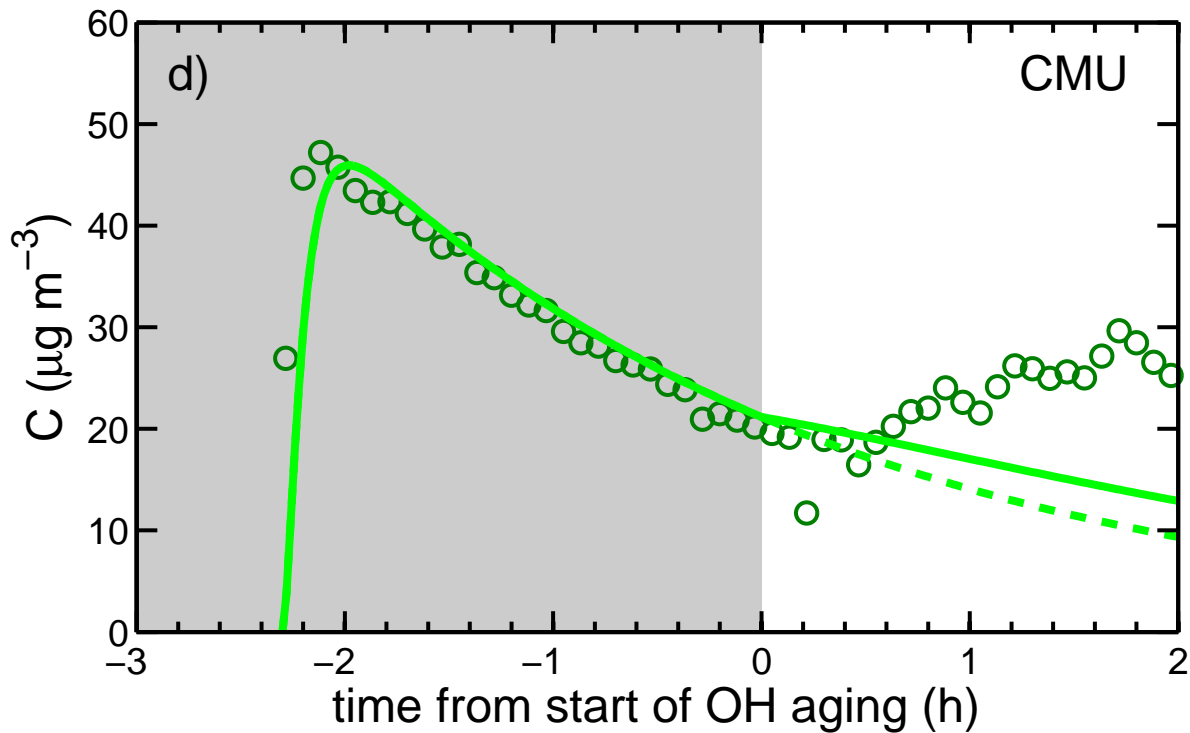

Supplement: Supplementary file 7 [file CMU_Chamber.pdf › Kinetic/figs/MUCHACHAS_Paper/CMU_Chamber.pdf]

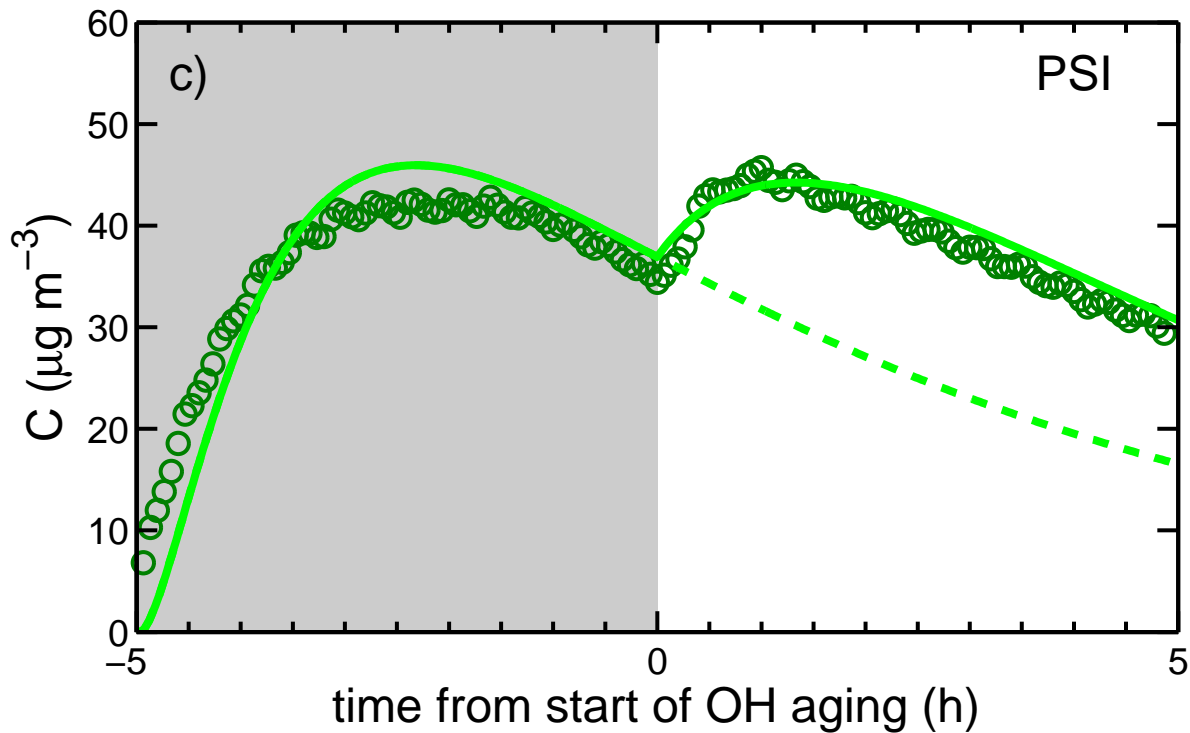

Supplement: Supplementary file 8 [file PSI_Chamber.pdf › Kinetic/figs/MUCHACHAS_Paper/PSI_Chamber.pdf]

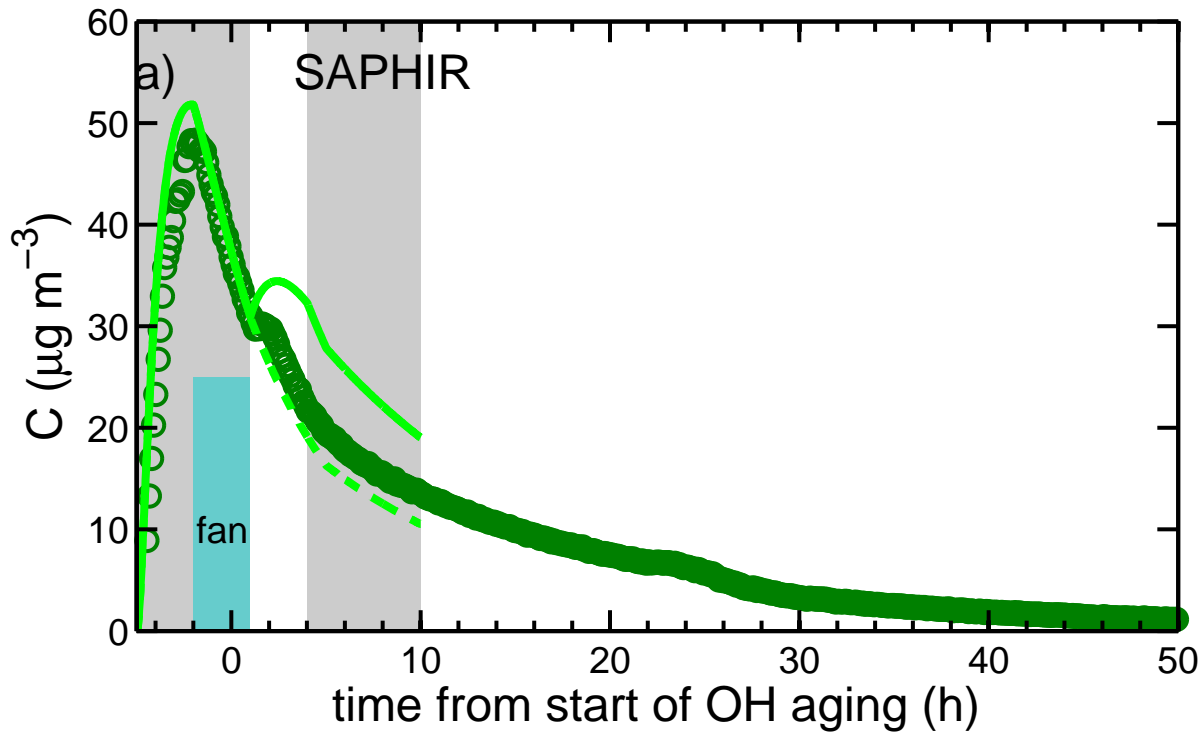

Supplement: Supplementary file 9 [file SAPHIR_Chamber.pdf › Kinetic/figs/MUCHACHAS_Paper/SAPHIR_Chamber.pdf]

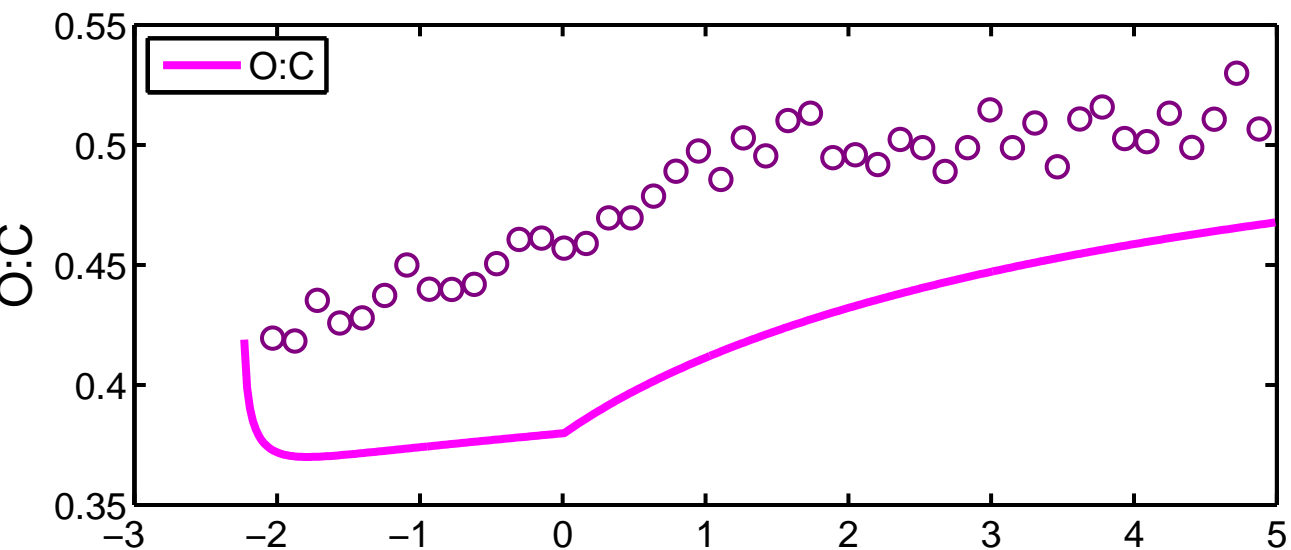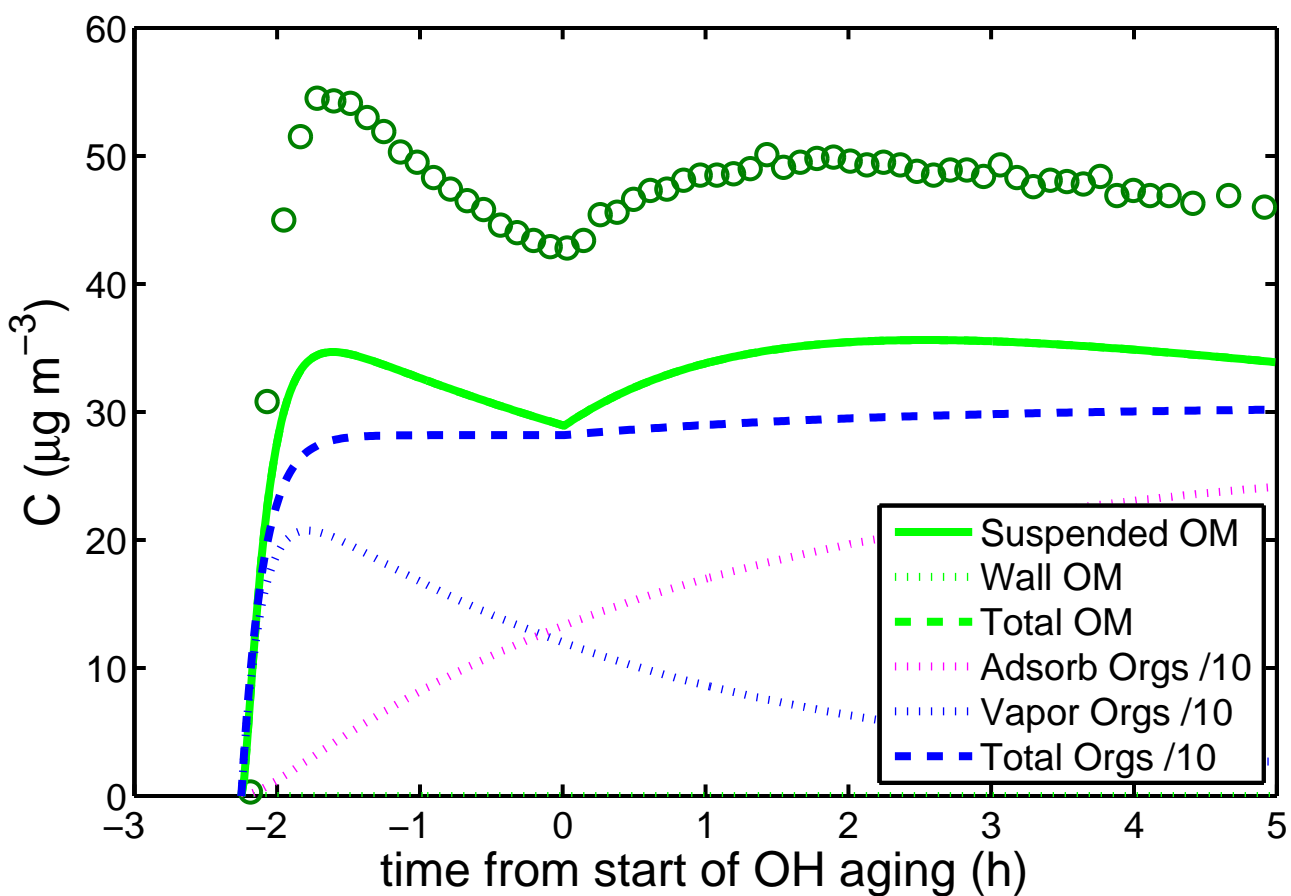

Supplement: Supplementary file 10 [file aida.pdf › Kinetic/figs/MUCHACHAS_Paper/aida.pdf]

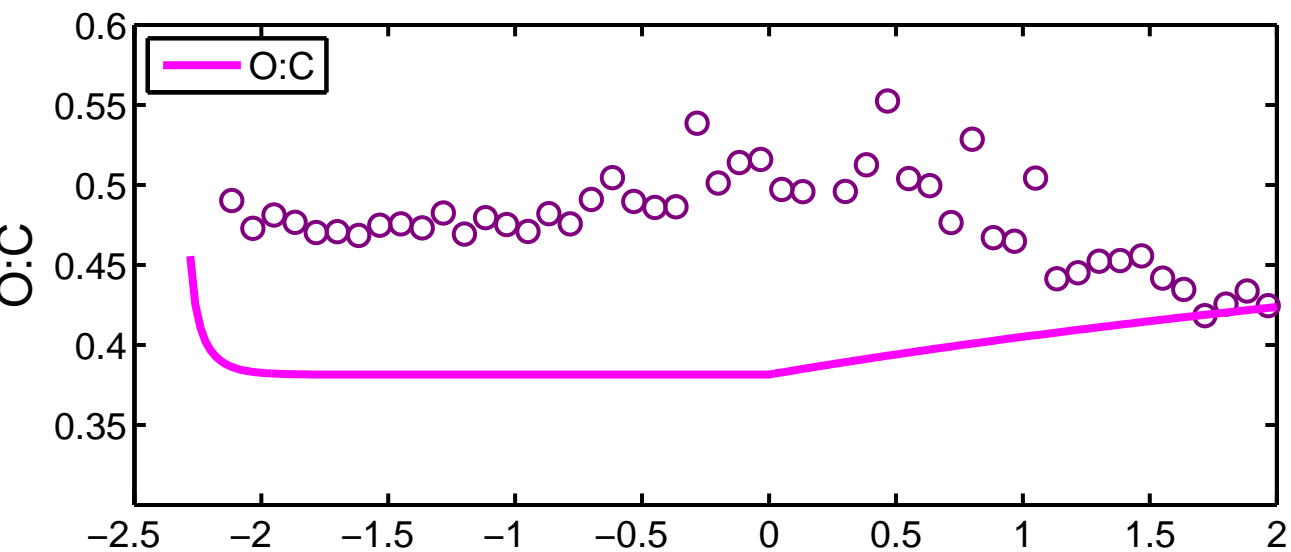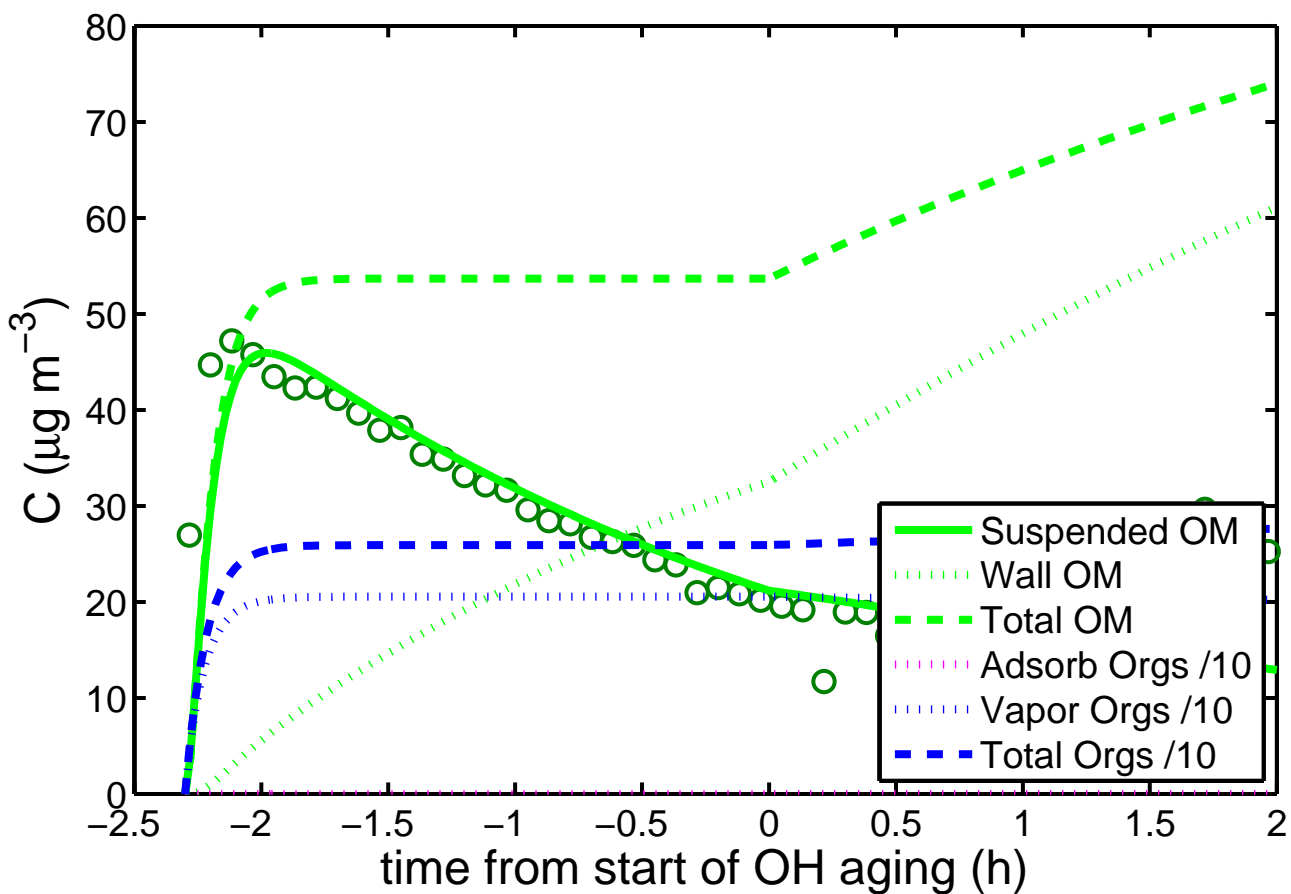

Supplement: Supplementary file 11 [file cmu.pdf › Kinetic/figs/MUCHACHAS_Paper/cmu.pdf]

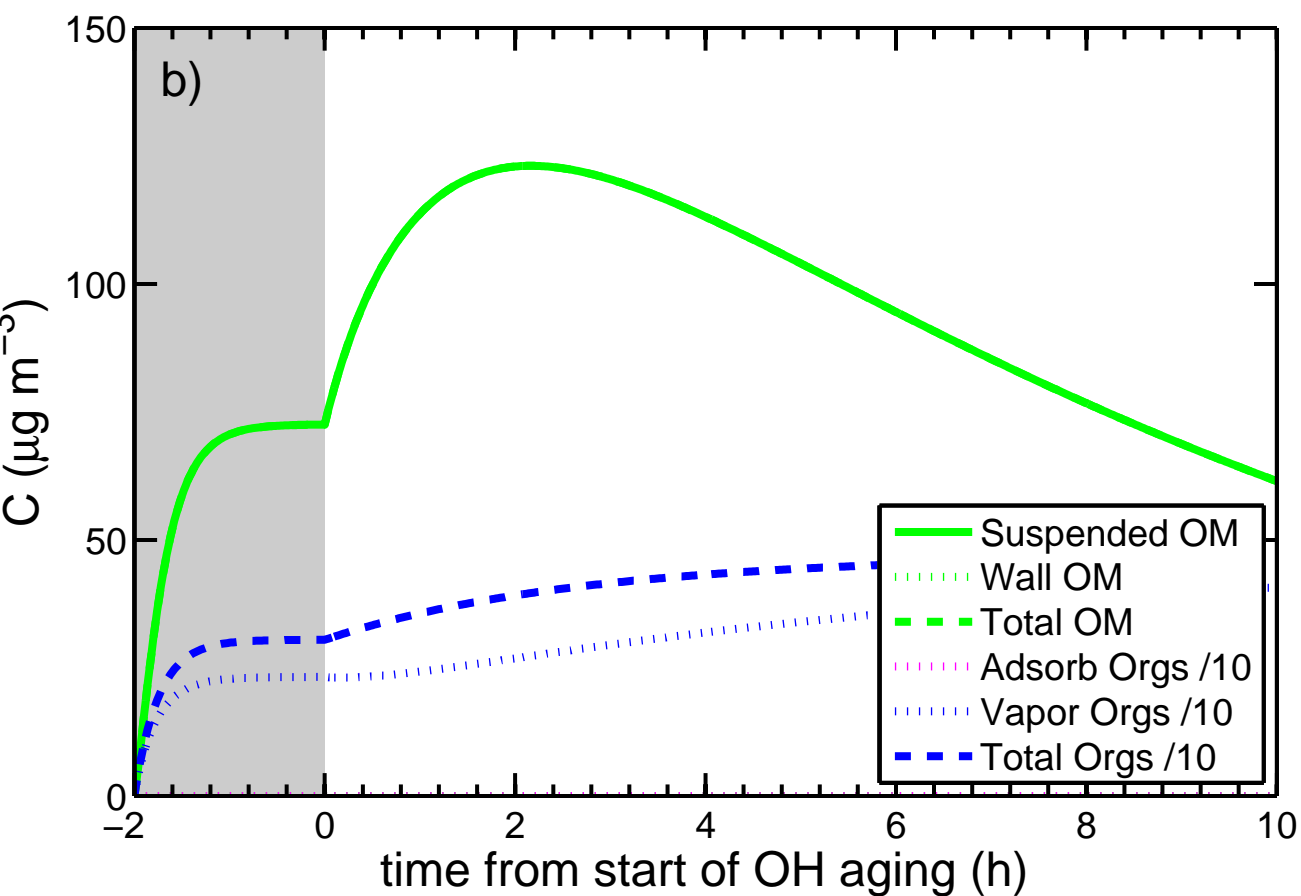

Supplement: Supplementary file 12 [file ideal_Chamber.pdf › Kinetic/figs/MUCHACHAS_Paper/ideal_Chamber.pdf]

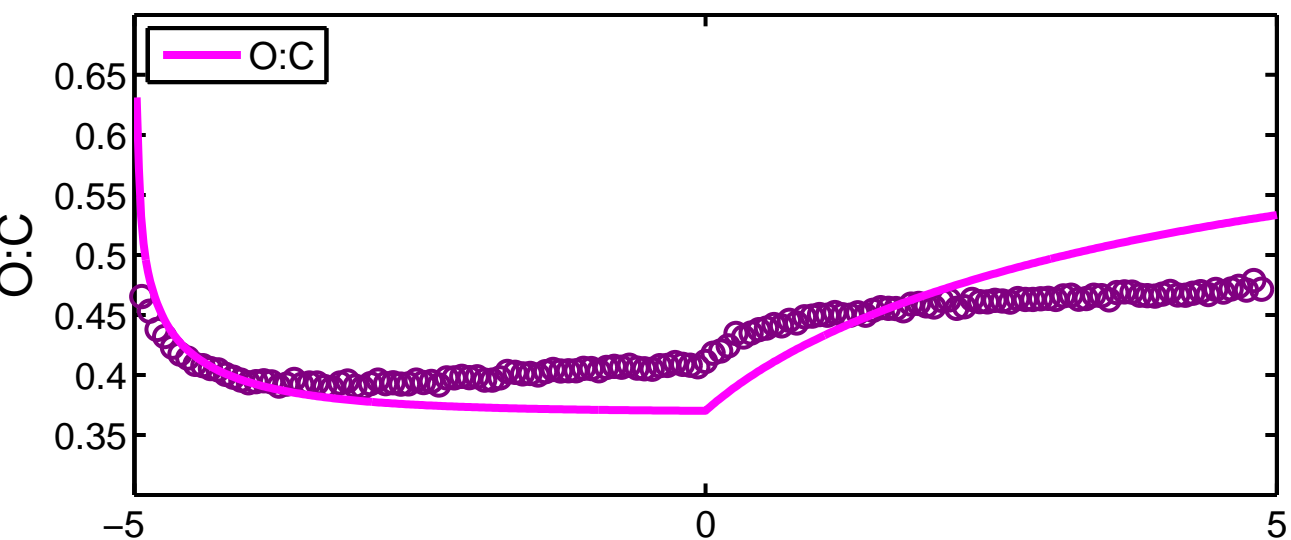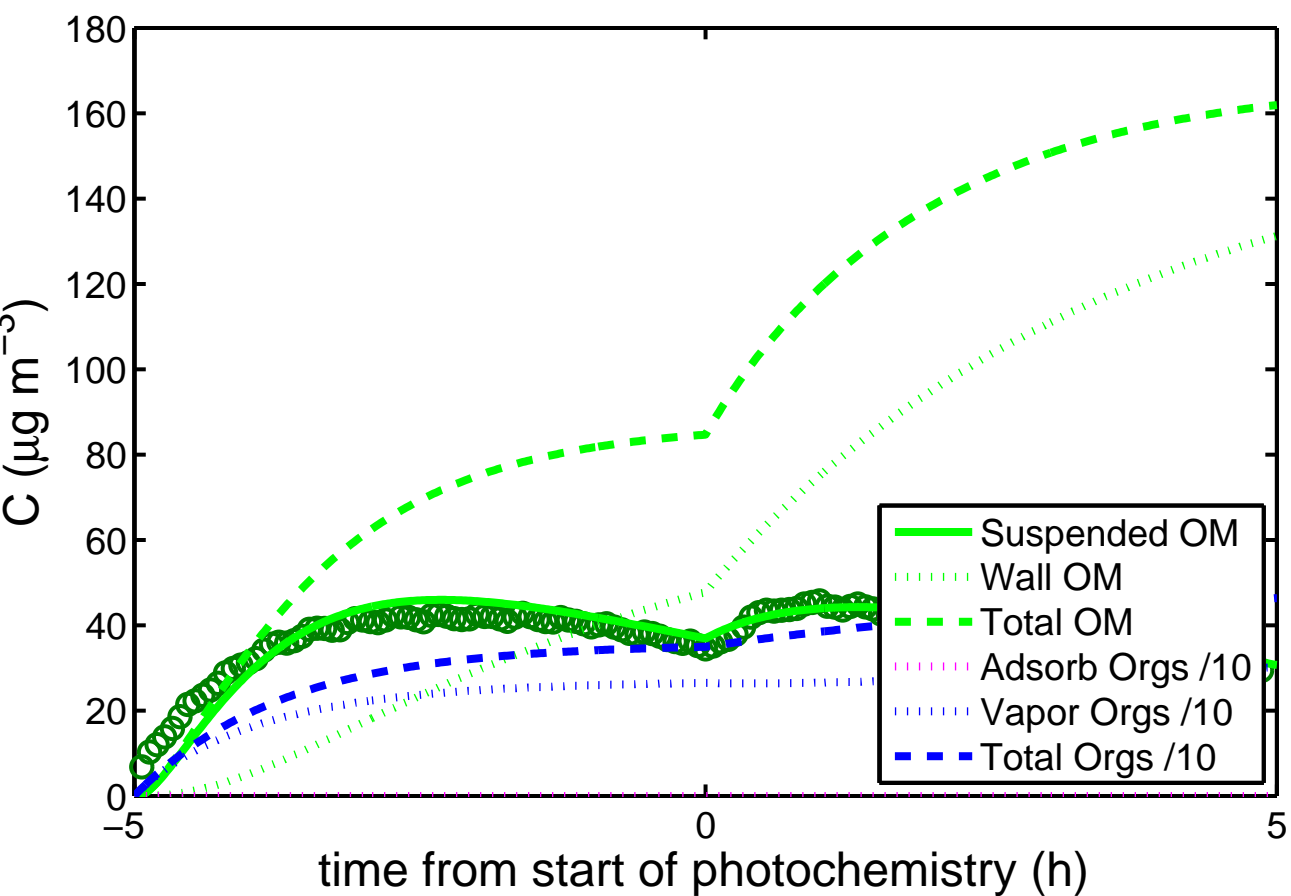

Supplement: Supplementary file 13 [file psi.pdf › Kinetic/figs/MUCHACHAS_Paper/psi.pdf]

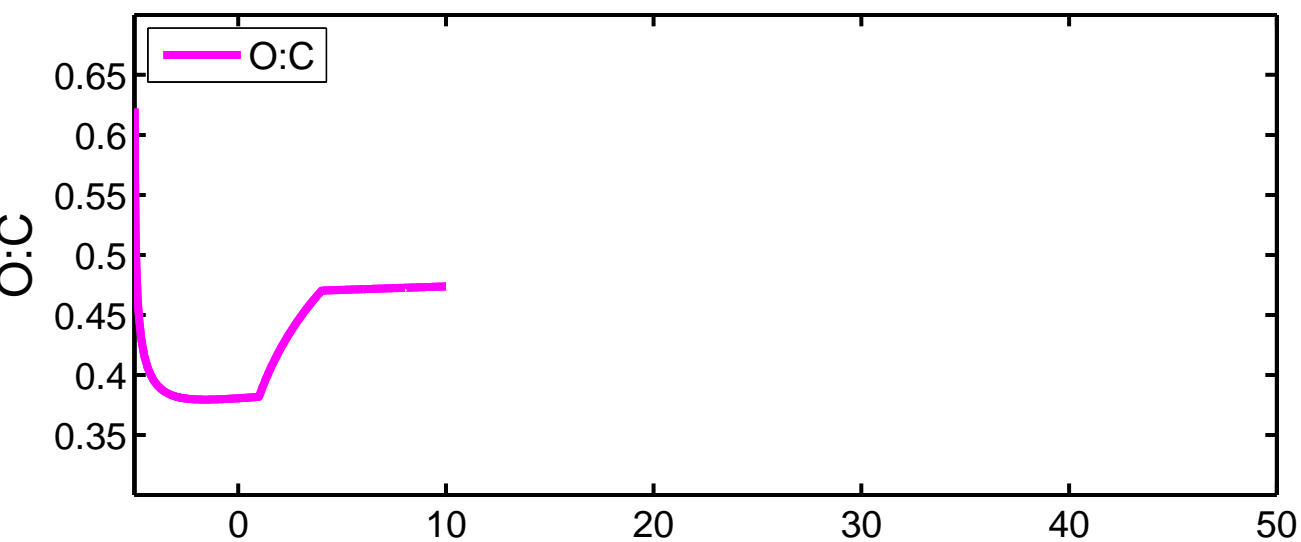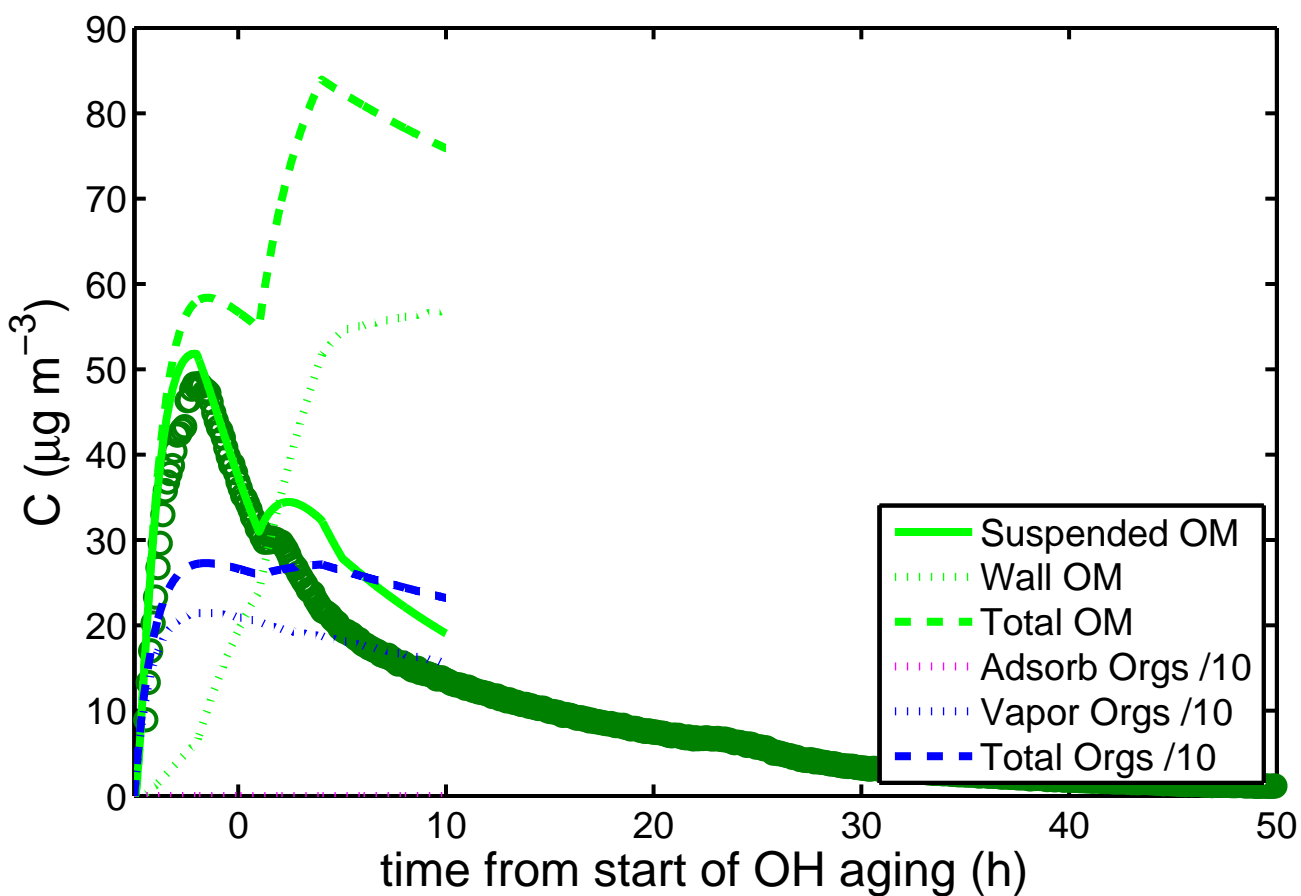

Supplement: Supplementary file 14 [file saphir.pdf › Kinetic/figs/MUCHACHAS_Paper/saphir.pdf]

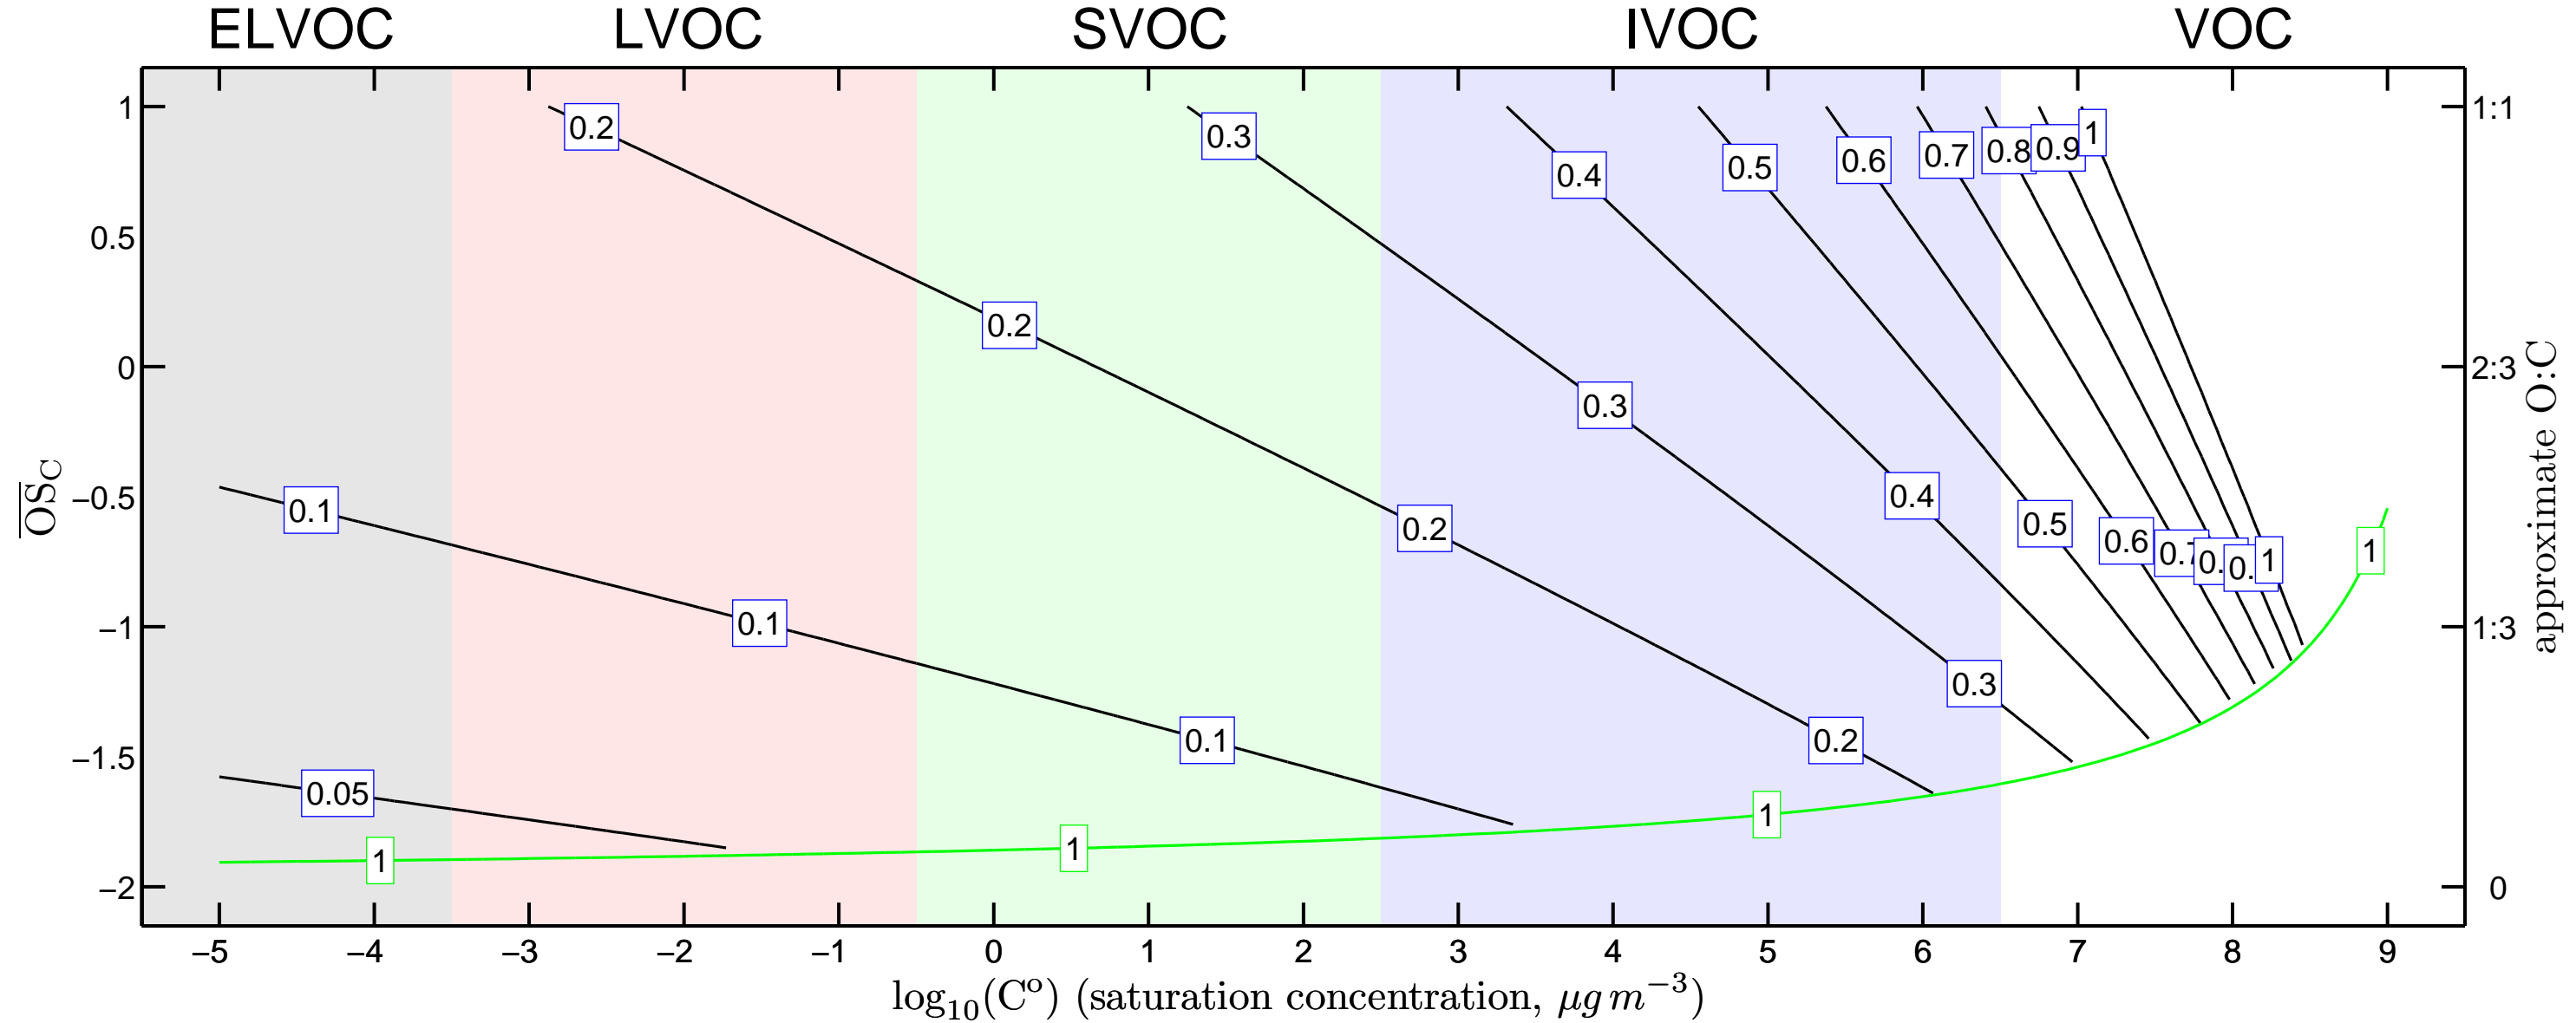

Supplement: Supplementary file 15 [file NtoC_ratio.pdf › Kinetic/figs/NtoC_ratio.pdf]

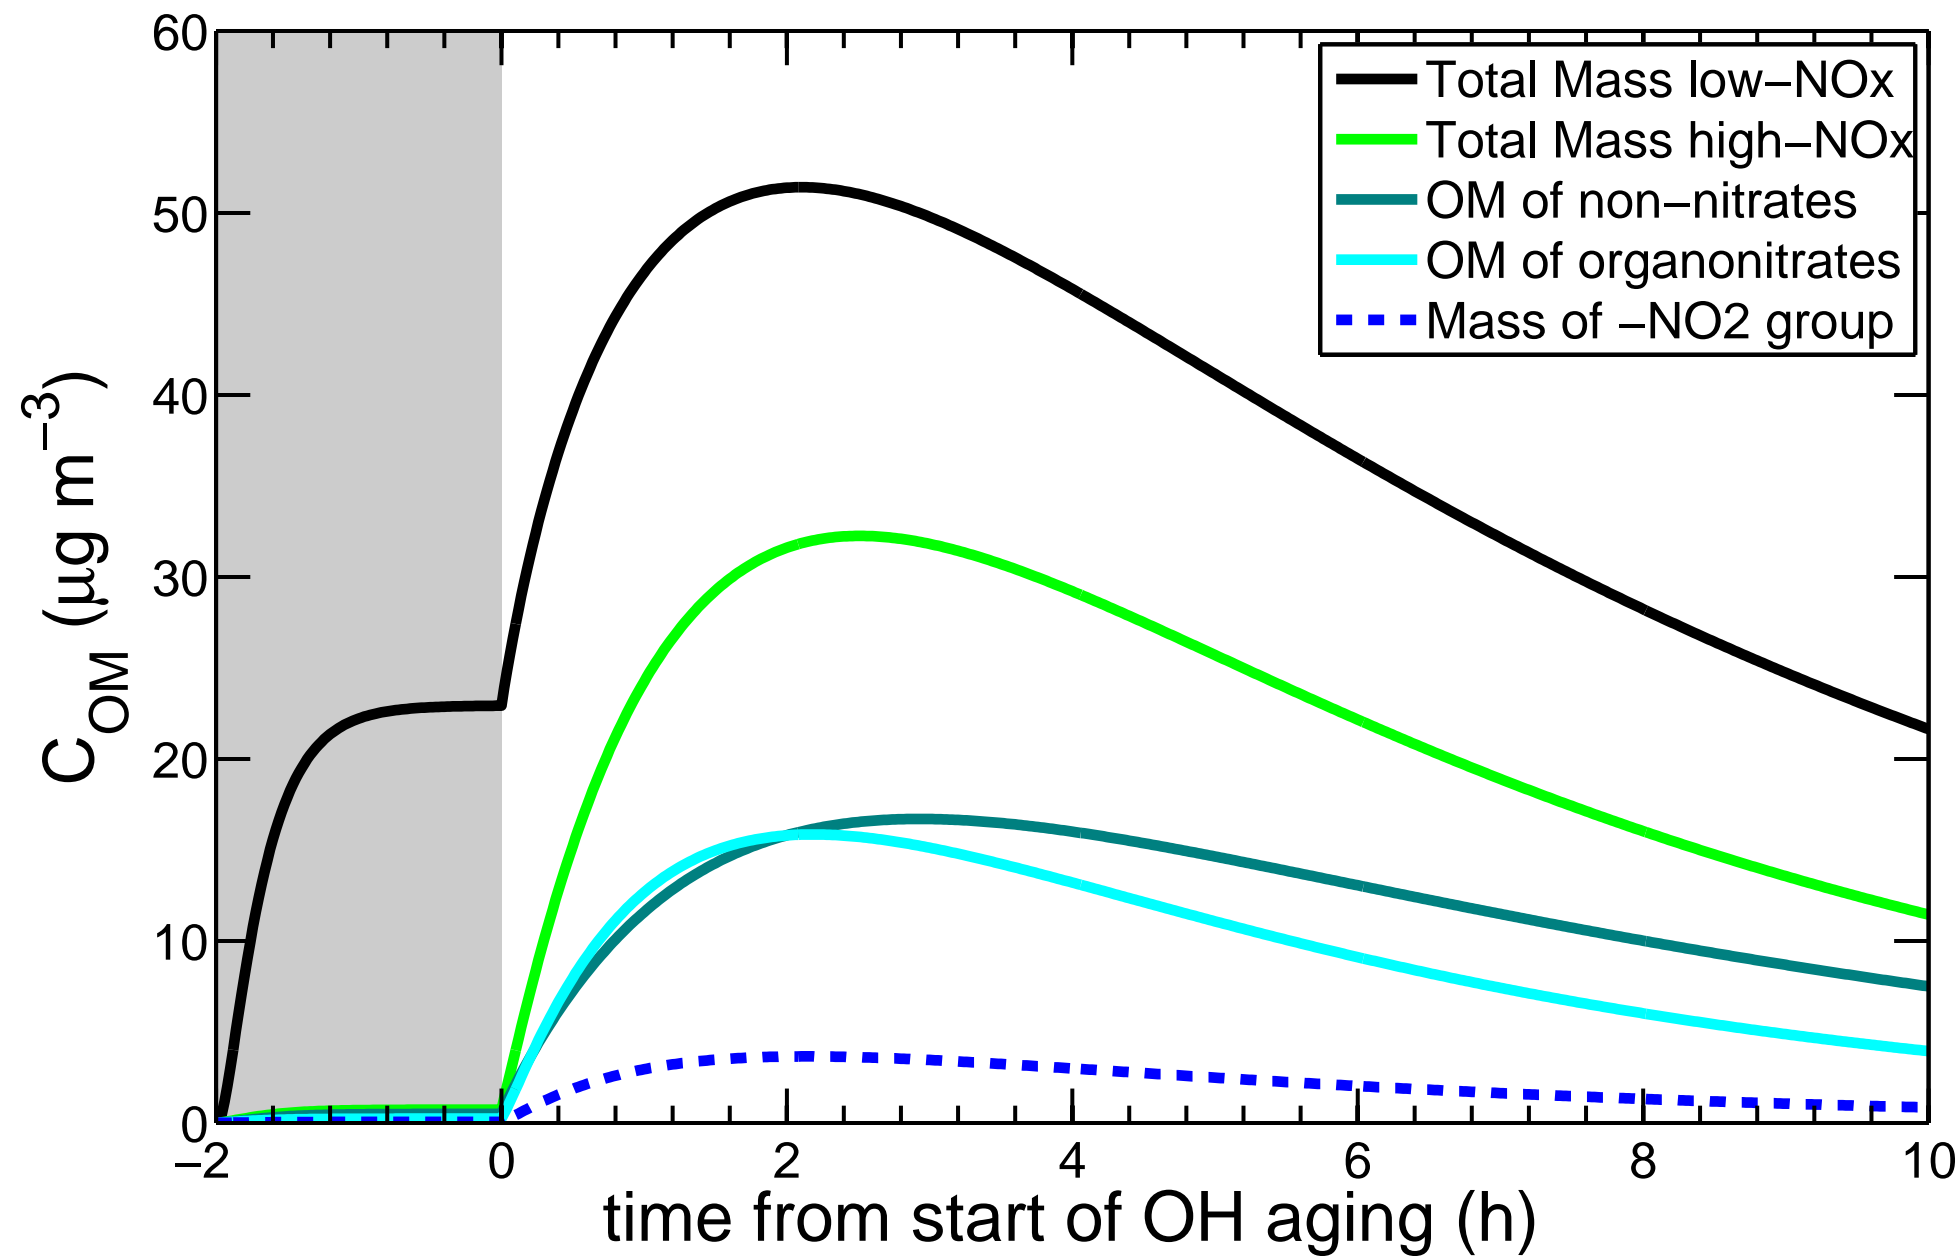

Supplement: Supplementary file 16 [file OM_compare_wrt_t_beta15_untitled.pdf › Kinetic/figs/OM_compare_wrt_t_beta15_untitled.pdf]

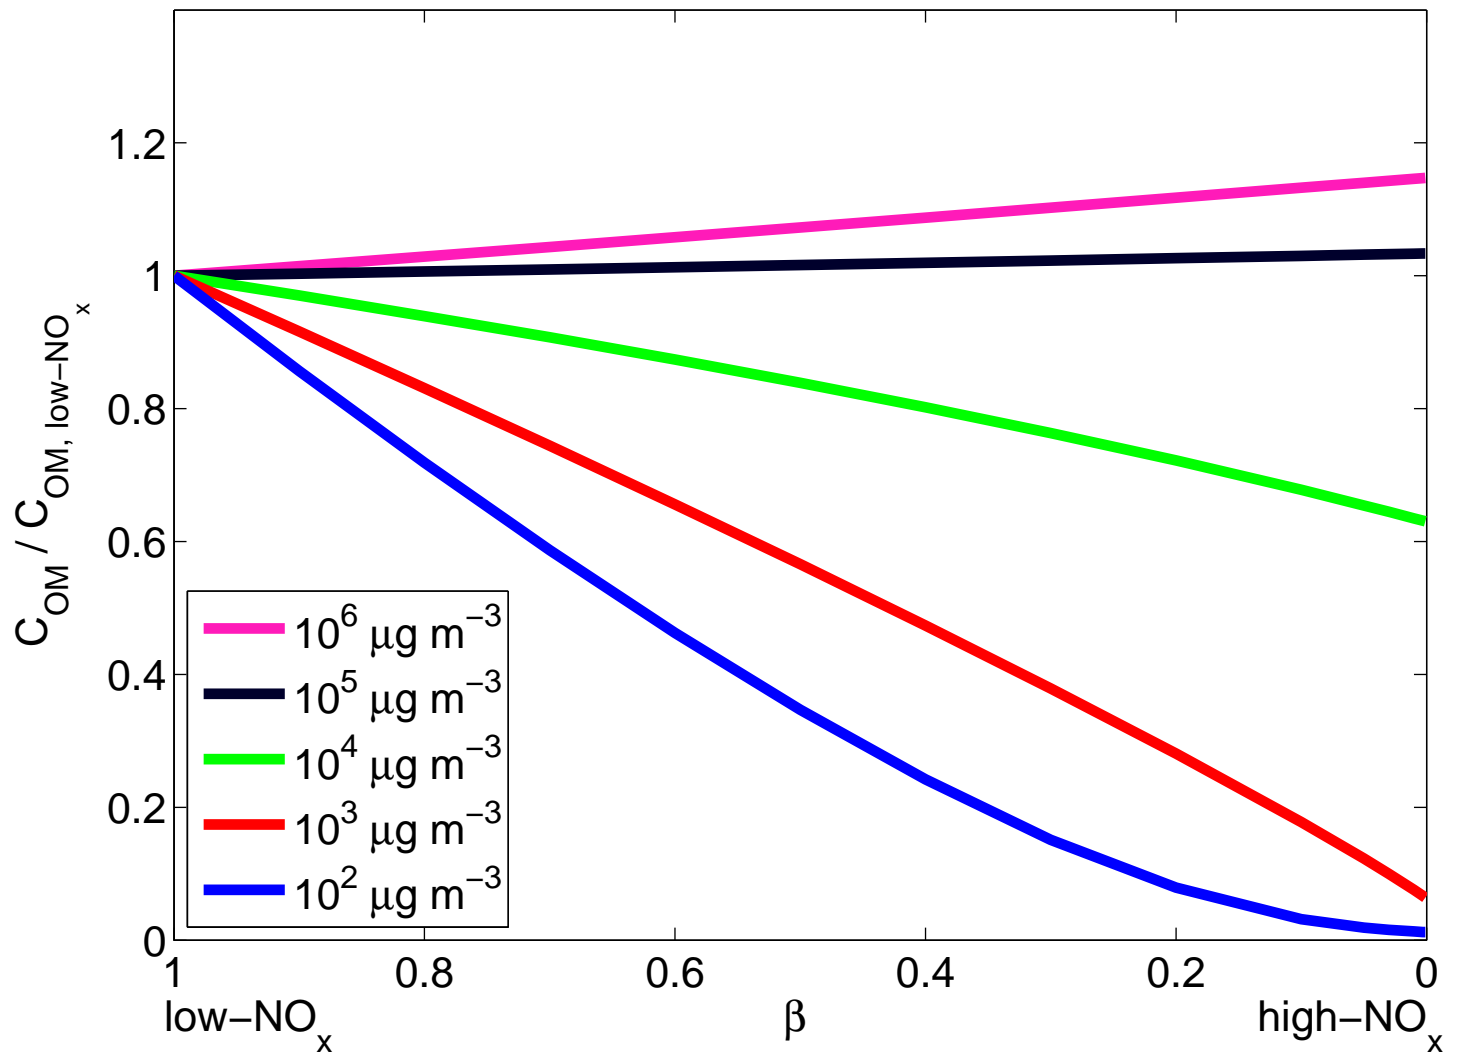

Supplement: Supplementary file 17 [file OM_varyConc_varyBeta_0hours.pdf › Kinetic/figs/OM_varyConc_varyBeta_0hours.pdf]

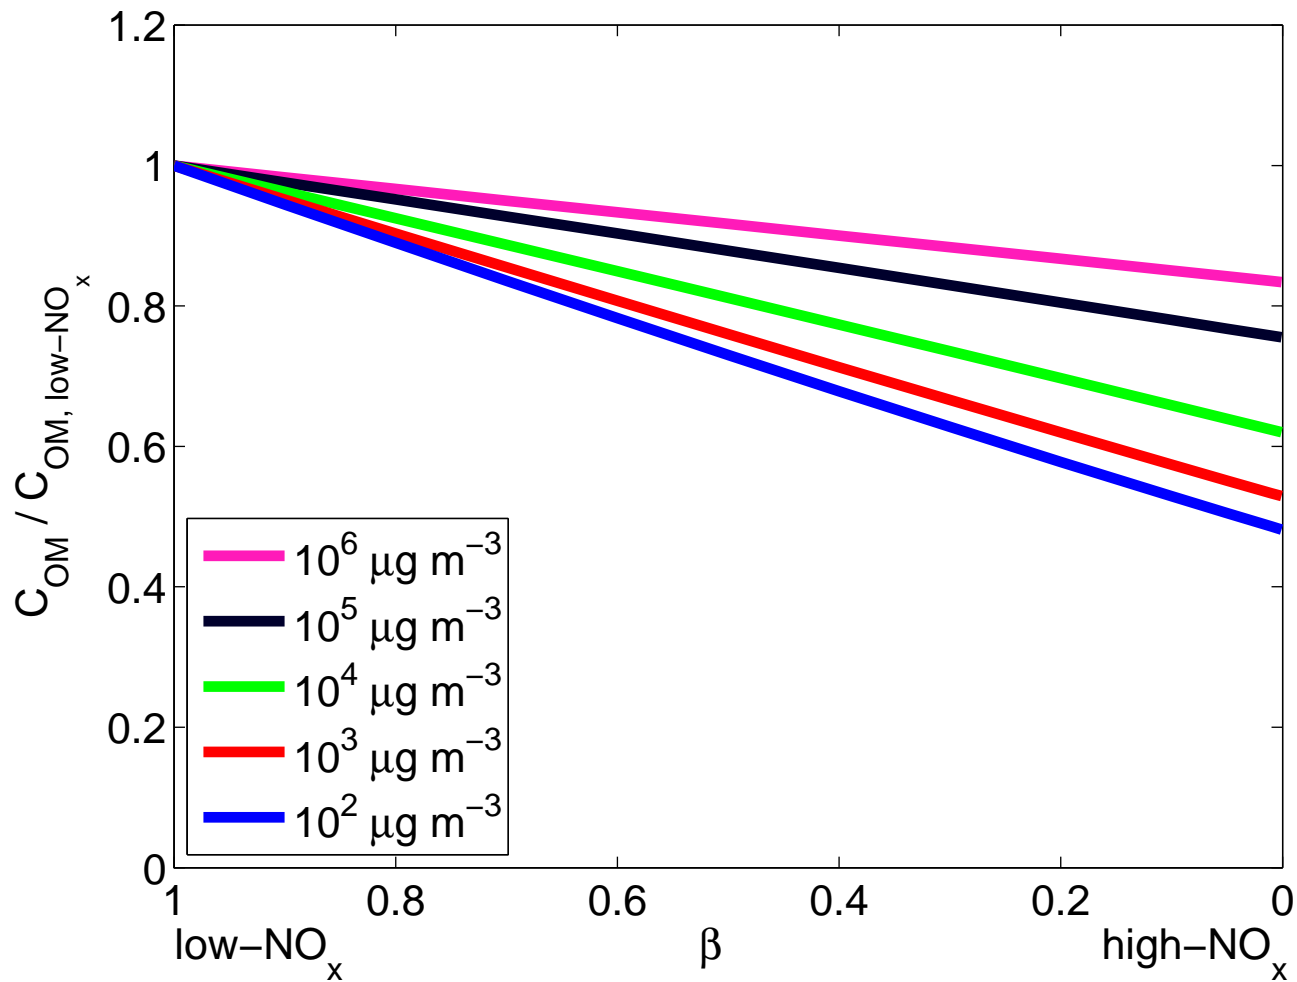

Supplement: Supplementary file 18 [file OM_varyConc_varyBeta_10hours.pdf › Kinetic/figs/OM_varyConc_varyBeta_10hours.pdf]
